# Supplementary material for: Trifluoroborate-modification of both pyridine and N-alkyldiarylamine-based π-conjugated polymer films: tuning the electronic communication and the mean conjugated length based on two types of nitrogen in the conjugated main segments
Source: Royal Society of Chemistry journal article supplement (doi:10.1039/c3ra40945g), 2013-01-01
Supplement: c3ra40945g.pdf [file c3ra40945g.pdf]

*Supporting Information*

**Trifluoroborate-modification of both pyridine and  
*N*-alkyldiarylamine-based  $\pi$ -conjugated polymer films:  
tuning the electronic communication and the mean  
conjugated length based on two types of nitrogen in the  
conjugated main segments**

Shotaro Hayashi\*, Atsushi Asano, Toshio Koizumi

*Department of Applied Chemistry, National Defense Academy,*

*1-10-20 Hashirimizu, Yokosuka, Kanagawa 239-8686, Japan*

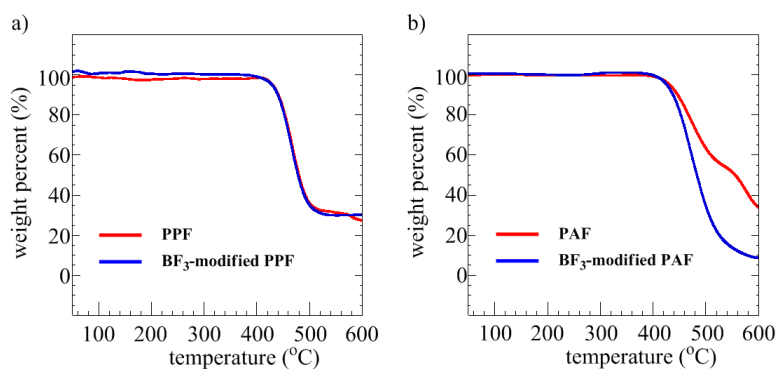

Fig. S1. TGA curve of **PPF** (a) and **PAF** (b) films before and after BF<sub>3</sub>-OEt<sub>2</sub> vapor treatment..

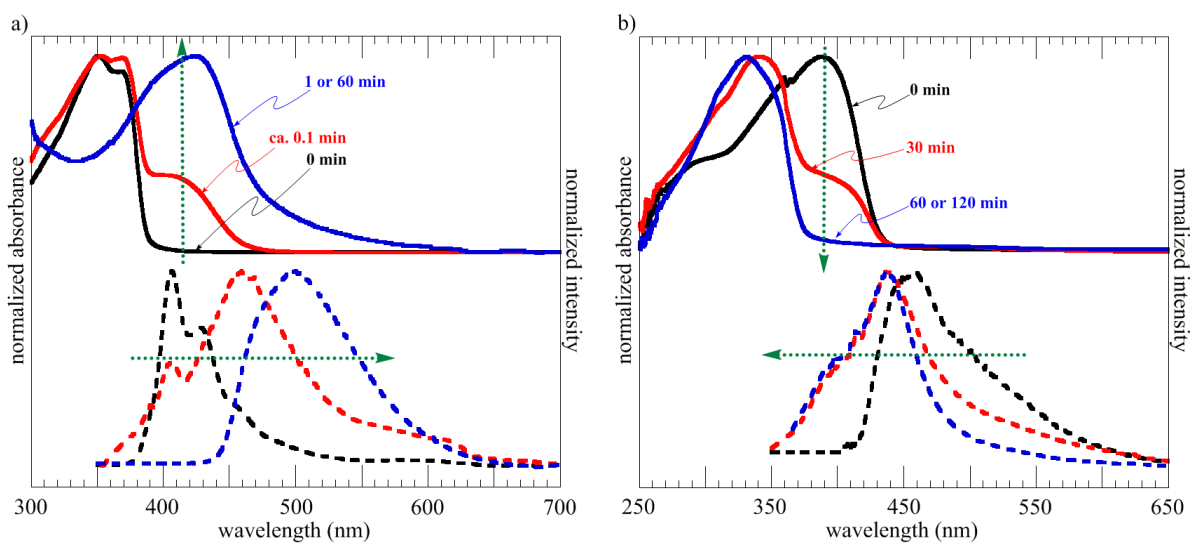

Fig. S2. UV-vis absorption (top) and fluorescence (bottom) spectra of **PPF** (a) and **PAF** (b) films before and after  $\text{BF}_3\text{-OEt}_2$  vapor treatment.
